# Whey Protein Hydrolysate Enhances HSP90 but Does Not Alter HSP60 and HSP25 in Skeletal Muscle of Rats

Carolina Soares Moura<sup>1\*</sup>, Pablo Christiano Barboza Lollo<sup>1</sup>, Priscila Neder Morato<sup>1</sup>, Luciana Hisayama Nisishima<sup>1</sup>, Everardo Magalhães Carneiro<sup>2</sup>, Jaime Amaya-Farfan<sup>1</sup>

**1** Department of Food and Nutrition, Faculty of Food Engineering, University of Campinas (UNICAMP), Campinas, São Paulo, Brazil, **2** Institute of Biology (IB), University of Campinas (UNICAMP), São Paulo, Brazil

## Abstract

Whey protein hydrolysate (WPH) intake has shown to increase HSP70 expression. The aim of the present study was to investigate whether WPH intake would also influence HSP90, HSP60 and HSP25 expression, as well as associated parameters. Forty-eight male Wistar rats were divided into sedentary (unstressed) and exercised (stressed) groups, and were fed with three different sources of protein: whey protein (WP), whey protein hydrolysate (WPH) and casein (CAS) as a control, based on the AIN93G diet for 3 weeks. WPH intake increased HSP90 expression in both sedentary and exercised animals compared to WP or CAS, however no alteration was found from exercise or diet to HSP60 or HSP25. Co-chaperone Aha1 and p-HSF1 were also increased in the exercised animals fed with WPH in comparison with WP or CAS, consistent with enhanced HSP90 expression. VEGF and p-AKT were increased in the WPH exercised group. No alteration was found in BCKDH, PI3-Kinase (p85), GFAT, OGT or PGC for diet or exercise. The antioxidant system GPx, catalase and SOD showed different responses to diet and exercise. The data indicate that WPH intake enhanced factors related to cell survival, such as HSP90 and VEGF, but does not alter HSP60 or HSP25 in rat skeletal muscle.

**Citation:** Moura CS, Lollo PCB, Morato PN, Nisishima LH, Carneiro EM, et al. (2014) Whey Protein Hydrolysate Enhances HSP90 but Does Not Alter HSP60 and HSP25 in Skeletal Muscle of Rats. PLoS ONE 9(1): e83437. doi:10.1371/journal.pone.0083437

**Editor:** Guillermo López Lluich, Universidad Pablo de Olavide, Centro Andaluz de Biología del Desarrollo-CSIC, Spain

**Received:** May 13, 2013; **Accepted:** November 5, 2013; **Published:** January 20, 2014

**Copyright:** © 2014 Moura et al. This is an open-access article distributed under the terms of the Creative Commons Attribution License, which permits unrestricted use, distribution, and reproduction in any medium, provided the original author and source are credited.

**Funding:** The authors are grateful to the Foundation for Research of the State of São Paulo, Brazil (FAPESP n° 2011/13035-1) for financial support and to Hilmar Ingredients (Hilmar, California, USA) for providing the whey protein products. The funders had no role in study design, data collection and analysis, decision to publish, or preparation of the manuscript.

**Competing Interests:** On behalf of all the authors, Dr. Lollo declares that the authors approved the revised competing interest statement: "Hilmar Ingredients, Brazil donated the whey proteins used in this study. There are no further patents, products in development or marketed products to declare". This does not alter the authors' adherence to all the PLOS ONE policies on sharing data and materials.

\* E-mail: linanutricao@yahoo.com.br

## Introduction

Heat shock proteins (HSPs) were discovered by Feruccio Ritossa in 1962 following observation of the chromosomes of *Drosophila melanogaster* that were submitted to heat shock treatment. HSPs are a complex physiological defense mechanism [1] that confer higher tolerance and cell resistance against a variety of aggressor agents, show a strong cytoprotective effect [2], favor the maintenance of cell integrity and structure and may promote cell survival during periods of stress. They may repair damaged proteins or facilitate their degradation when the damage is irreversible [1,3]. Heat shock proteins may be grouped into families that are classified according to their molecular weight, such as HSP90, HSP70, HSP60 and HSP25 [1]. The process of HSPs synthesis involves heat shock factor (HSF1), which is phosphorylated and upon reaching the nucleus, binds to the gene promoter that synthesizes these proteins.

The increase in HSPs content has been shown to provide cytoprotection to skeletal muscle against stress from exercise and some forms of muscle damage [4,5] and it is believed that the development of new strategies and procedures that may increase the expression of HSPs would be of practical relevance [6].

Whey protein (WP) represents approximately 20% of the proteins present in bovine milk and has been recognised for its high nutritive value, high digestibility and fast absorption. In

particular, whey protein hydrolysate (WPH), has shown several important features, such as protective effect against oxidative stress, demonstrating its antioxidant capacity [7], reduction of muscle damage markers in humans [8], increased glycogen and GLUT4 translocation [9], and an anti-stress effect [10,11].

We have recently shown, for the first time, that the intake of whey protein hydrolysate (WPH) increases the exercise-induced HSP70 expression in several tissues [10]. The aim of the present study was to investigate whether WPH intake also influences the expression of other HSPs and their pathway, as well as parameters associated with cell survival, such as the vascular endothelial growth factor (VEGF).

## Materials and Methods

### Animals

Forty-eight male Wistar rats (specific-pathogen free) from the Multidisciplinary Center for Biological Research (University of Campinas, SP, Brazil) were maintained under controlled conditions (temperature: 22°C, humidity 55%, reverse 12-hour light/dark cycle) in individual growth cages with access to commercial feed (Labina, Purina, Brazil) and water *ad libitum*, until they reached 150 g of body mass. The Ethics Committee on Animal Experimentation of the University of Campinas approved all experimental procedures (CEEA-UNICAMP, protocol 2297-1).

## Experimental diets and procedures

The diets were based on the AIN93-G diet [12], except that the protein content was 12% [10] and whey protein (WP), whey protein hydrolysate (WPH) or casein (CAS, control) was the only protein source used. Table 1 shows the diet formulation and the amino acid profile of the protein sources. When the animals reached 150 g ( $\pm 5.2$ ) of body mass, they were randomly assigned to six groups ( $n = 8$ ), corresponding to the three diets (CAS, WP and WPH) and two exercise regimes: Sedentary (unstressed) and exercised (stressed). The diets were consumed for 3 weeks.

## Exercise protocol

The animals in the exercised groups were subjected to five exercise sessions on a treadmill at the speed of 22 m/min for 30 minutes in the last week of treatment (last five days). Exercise on a treadmill is known to be an effective way to promote HSP response and has been adopted by researchers for this purpose

[10,13]. After the last exercise session, the rats were allowed to recover for 6 hours for maximal HSP expression, and were then killed by decapitation [14].

## Western blotting

The gastrocnemius sample (200 mg) was homogenized in 5 volumes of buffer (200 mM EDTA (Sigma 03685), pH 7.0, 1M Tris Base (Bio-Rad #161-0719), pH 7.5, 10 mM orthovanadate (Sigma S6508), 2 mM phenylmethanesulfonyl fluoride (Sigma P7626), 10 mM sodium pyrophosphate (Sigma 221368), 0.1 mg/mL aprotinin (Sigma 10820), 100 mM sodium fluoride (Sigma 71519), Triton 10% (Sigma #019K0151), ultrapure water) using Polytron (Pro Scientific model Pro 200) and centrifuged (Sigma, model 2K15, number serial 57707, Germany) at 14,000 g for 40 minutes at 4°C and the supernatant was collected. The total protein content was determined in the supernatant using the Lowry method [15]. The samples were treated with Laemmli buffer containing dithiothreitol (DTT) (Bio-Rad #161-0611). After heating samples at 95°C for 5 min, the proteins were subjected to SDS-PAGE (8%) and transferred using a semi-dry system (Bio-Rad, CA, USA) to a nitrocellulose membrane of 0.22  $\mu$ M (Bio-Rad, cat. 162-0112). A molecular weight standard was used and run concurrently on each gel for accurate determination of the proper molecular weight for each antibody (Thermo Scientific, #26634). The nitrocellulose membranes were treated with blocking buffer (3% nonfat dried milk or albumin, 10 mmol/L Tris Base (Bio-Rad #161-0719), 150 mmol/L NaCl (Sigma 71379), and 0.02% Tween 20 (Sigma P1379).

The membranes were incubated with the appropriate primary antibodies overnight to assess the protein level of: HSP90 (Stressgen, Victoria, BC, Canada; Ref. ADI-SPA 831 diluted 1:3000, MW90 kDa), HSP60 (Stressgen, Victoria, BC, Canada; Ref. ADI-SPA 806 diluted 1:2000, MW60 kDa), HSP25 (Stressgen, Victoria, BC, Canada; Ref. ADI-SPA 801 diluted 1:2000, MW25 kDa), Aha1 (Abcam, Cambridge, Ref. ab83036 diluted 1:2000, MW38 kDa), SOD (Abcam, Cambridge, Ref. ab51254 diluted 1:10,000, MW18 kDa), Catalase (Santa Cruz, CA, USA, Ref. sc271803 diluted 1:1000, MW55 kDa), GPx (Abcam, Cambridge, Ref. ab22604 diluted 1:2000 MW22 kDa), p-HSF1 phosphorylated in serine 230 (Santa Cruz, CA, USA, Ref. sc30443 diluted 1:1000, MW90 kDa), HSF (Stressgen, Victoria, BC, Canada; Ref. SPA 950 diluted 1:500), GFAT (Santa Cruz, CA, USA, Ref. sc134894 diluted 1:1000, MW77 kDa), OGT (Abcam, Cambridge, Ref. ab59135 diluted 1:1000, MW110 kDa), GAPDH (Stressgen, Victoria, BC, Canada, Ref. ADI 905734 diluted 1:1000), VEGF (Abcam, Cambridge, Ref. ab46154 diluted 1:2000, MW43 kDa), BCKDH (Abcam, Cambridge, Ref. ab59747 diluted 1:2000, MW46 kDa), p-AKT phosphorylated in serine 473 (Santa Cruz, CA, USA, Ref. sc7985-R diluted 1:1000, MW56 kDa), AKT (Santa Cruz, CA, USA, Ref. sc8312 diluted 1:1000, MW56 kDa), PI 3-Kinase (p85), N-SH2 domain (catalog number #06-496, Upstate Biotechnology NY, USA diluted 1:1000) and PGC (Abcam, Cambridge, Ref. ab72230 diluted 1:1000, MW110 kDa). The appropriate secondary antibodies were used for detection. The bands were visualized using a UVITEC Cambridge instrument (model Alliance LD2). The blots were quantified using the digital program UVITEC.

## Determination of amino acids of the protein sources and muscle samples

The protein sources (dry basis) were hydrolysed at 110°C in 6 M HCl (Merck 1003171000) for 24 hours. The hydrolysed samples were then diluted in deionized water,  $\alpha$ -aminobutyric (Sigma 162663) acid was added as the internal standard, and the amino

**Table 1.** Formulation of the diets (g/kg of diet) and amino acid profile of the protein sources.

| Item                      | CAS    | WP     | WPH    |
|---------------------------|--------|--------|--------|
| <b>Diet Composition</b>   |        |        |        |
| Corn Starch               | 437.92 | 427.31 | 425.00 |
| Dextrinised starch        | 145.42 | 141.90 | 141.13 |
| Sucrose                   | 110.16 | 107.50 | 106.92 |
| WPH                       | -----  | -----  | 156.41 |
| WP                        | -----  | 152.77 | -----  |
| CAS                       | 135.96 | -----  | -----  |
| Vegetable oil             | 70.00  | 70.00  | 70.00  |
| Fiber (cellulose)         | 50.00  | 50.00  | 50.00  |
| Mineral mixture           | 35.00  | 35.00  | 35.00  |
| Vitamin mixture           | 10.00  | 10.00  | 10.00  |
| L-Cystine                 | 3.00   | 3.00   | 3.00   |
| Choline bitartrate        | 2.50   | 2.50   | 2.50   |
| Tert-butylhydroquinone    | 0.014  | 0.014  | 0.014  |
| <b>Amino acid profile</b> |        |        |        |
| Aspartate                 | 5.96   | 11.52  | 11.16  |
| Glutamate                 | 19.00  | 18.82  | 17.99  |
| Serine                    | 4.68   | 5.31   | 5.04   |
| Glycine                   | 1.39   | 1.74   | 1.75   |
| Histidine                 | 2.12   | 1.31   | 1.27   |
| Arginine                  | 3.03   | 2.66   | 2.31   |
| Threonine                 | 3.56   | 7.64   | 7.40   |
| Alanine                   | 2.30   | 5.11   | 4.89   |
| Proline                   | 8.85   | 5.89   | 5.68   |
| Tyrosine                  | 4.57   | 2.88   | 2.78   |
| Methionine                | 2.32   | 2.51   | 2.52   |
| Cystine                   | 0.16   | 1.48   | 1.60   |
| Isoleucine                | 4.51   | 6.88   | 6.97   |
| Leucine                   | 7.62   | 10.14  | 10.15  |
| Valine                    | 5.36   | 5.68   | 5.81   |
| Phenylalanine             | 3.89   | 2.86   | 2.78   |
| Lysine                    | 6.62   | 9.20   | 9.48   |

doi:10.1371/journal.pone.0083437.t001

acids were derivatized with phenylisothiocyanate (Sigma P1034). The gastrocnemius free amino acids were extracted with 80/20 (v/v) methanol and HCL 0.1 M prior to derivatization. For neutral amino acids and basic amino acid was used standard from Sigma (A6407; A6282 respectively). The PTH-derivatives were chromatographed using a Luna C-18, 100 Å; 5 µm, 250×4.6 mm (00G-4252-EQ) column at 50°C, detected at 254 nm [16]. The retention times were (min): aspartate 3.04, glutamate 3.37, hydroxyproline 4.62, asparagine 5.90, serine 6.21, glutamine 6.65, glycine 6.86, histidine 8.0, taurine 9.32, arginine 9.81, threonine 10.87, alanine 11.70, proline 13.39, tyrosine 32.56, valine 37.18, methionine 40.51, cysteine 47.67, isoleucine 49.17, leucine 49.89, phenylalanine 56.08, tryptophan 59.0, lysine 61.08.

### Blood sample collection

Blood samples were collected at sacrifice and centrifuged at 3000×g (4°C, 15 min) to obtain the serum. Analyses of serum for uric acid, creatine kinase (CK), lactate dehydrogenase (LDH), aspartate aminotransferase (AST), alanine aminotransferase (ALT), total protein, albumin, creatinine and urea were carried out using a clinical kits (Laborlab, São Paulo, Brazil) with spectrophotometric determination (Beckman-Coulter DU640, CA, USA). Glucose in the blood was measured using an Accu-Chek Active glucometer (Roche Diagnostics, Mannheim, Germany).

### Data analysis

The data were analyzed by ANOVA, followed by the Duncan post-hoc test, using SPSS (Statistical Package for the Social Sciences, Chicago, United States) software version 17.0. The level for significance was set to  $p < 0.05$ .

## Results

### HSP90, HSP60, HSP25, Aha1 and p-HSF1

Whey protein hydrolysate (WPH) intake promoted an increase in HSP90 expression in sedentary and exercised animals, compared to WP and CAS. No effect due diet or exercise was observed on HSP60 or HSP25 expression, as illustrated in Figure 1 (A, B, C), respectively and Figure 2.

Co-chaperone activator of heat shock protein ATPase (Aha1) expression followed the elevation found in HSP90 promoted by WPH intake when compared to casein (control) or whey protein (WP) in exercised animals (Figure 1 – D). Figure 1 (E) shows that there was increase in phosphorylated heat shock factor (p-HSF1) expression, leading to HSF1 activation, caused by WPH intake in exercised animals.

### VEGF, p-AKT, PI3-Kinase and BCKDH

Vascular endothelial growth factor (VEGF) increased in exercised animals that consumed WPH and WP compared to CAS. No difference was observed between the diets in sedentary animals, as shown in Figure 1 (F). The data show that WPH intake in the exercised group increased phosphorylated protein kinase B (p-AKT) expression when compared to casein and whey protein; however, no alteration was observed in the sedentary group for the different protein sources (Figure 1 G). No effect of diet or exercise was observed on phosphatidylinositol kinase (PI3-kinase/p85) or branched-chain  $\alpha$ -keto acid dehydrogenase (BCKDH) (Figure 1H and I respectively).

### OGT and GFAT - Hexosamine biosynthetic pathway

O- $\beta$ -acetylglucosaminyltransferase (OGT) and glutamine fructose-6-amidotransferase (GFAT), key proteins of the hexosamine

biosynthetic pathway were not affected by the different protein sources or exercise, as illustrated in Figure 1 (J, K), respectively and Figure 2.

### GPx, SOD and catalase – Antioxidant system

There was no difference in the expression of glutathione peroxidase (GPx), according to Figure 1 (L). Catalase showed a progressive reduction from sedentary animals to exercised animals (Figure 1 M). Superoxide dismutase (SOD) was reduced in sedentary animals that consumed WPH in comparison with WP and CAS. However, there was no difference between the protein sources in the exercised group (Figure 1 N). Diet and exercise had no effect on peroxisome proliferator-activated receptor- $\gamma$  coactivator (PGC 1 $\alpha$ ) (Figure 1 O and Figure 3).

### Dietary intake and weight parameters

Table 2 shows that the consumption of the different protein sources did not affect daily food consumption and did not differ in their effects on weight gain, protein efficiency ratio (PER) or food efficiency coefficient (FEC). Furthermore, none of the protein sources altered organ weight, which remained normal.

### Blood analysis

The consumption of the different protein sources by the sedentary or the exercised group did not alter kidney, liver or muscle damage parameters, as illustrated in Figure 3 (E–J). With regard to albumin and total serum protein parameters (Figure 3 A, B), there was increase in the animals that received WP and WPH diets in either both sedentary and the exercised groups, compared to the casein diet. Uric acid was not affected by the protein source in the sedentary group. However, in the exercised group, WPH increased uric acid in comparison with casein. Exercise also increased the uric acid concentration, but only in the animals that consumed WP and WPH (Figure 3 C). Glucose was lower in the sedentary animals in the WPH group in comparison with casein (Figure 3 D).

### Muscle free amino acid profile

Previous work suggests the involvement of plasma free branched chain amino acids (BCAAs) in the enhancement of HSP70 [10] it was desirable to verify if there would be a similar effect in muscle. There was a significant difference in all free amino acids in the muscle (Table 3), with the exception of serine, histidine, methionine and phenylalanine. The intake of WP associated with exercise resulted in increased concentrations of valine. Isoleucine showed a different behavior, such that WPH intake increased its concentration in both the sedentary and exercised groups when compared to other protein sources (casein and WP). Exercise also increased isoleucine in all dietary groups. WPH increased leucine in the sedentary group, whereas in the exercised group both WP and WPH increased leucine. The sum of BCAAs (isoleucine, valine and leucine) for the different protein sources is illustrated in the Figure 1 (P).

## Discussion

We have recently reported that whey protein hydrolysate intake increases HSP70 expression in different rat tissues [10]. The aim of the present study was to investigate whether the intake of the same dietary proteins (whey protein concentrate and hydrolysate as well as casein) as a protein source in the diet influences the expression of other HSPs such as HSP90, HSP60 and HSP25 and parameters related to the HSP system.

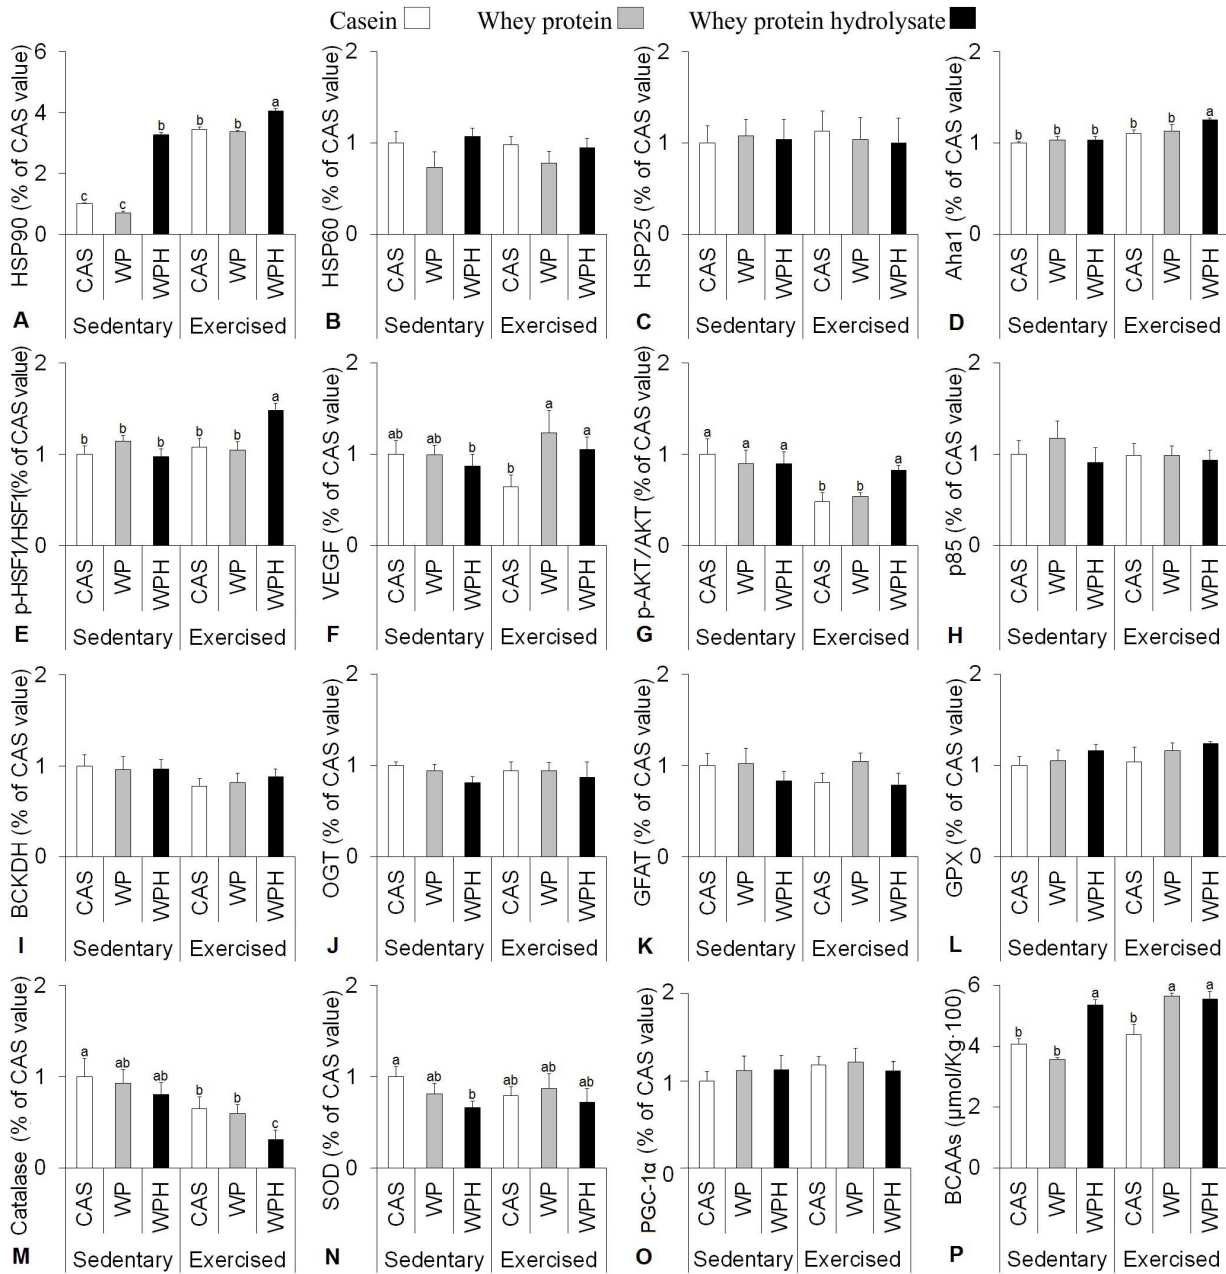

**Figure 1. Exercised groups were subjected to five sessions on a treadmill at the speed of 22 m/min for 30 minutes during the last week of the diet treatment.** The data were obtained from gastrocnemius collected 6 hours after the last exercise session (n = 8 per group). The dietary proteins were consumed for 3 weeks. Mean and standard error for the Western blot analysis of: HSP90 (A), HSP60 (B), HSP25 (C), Aha1 (D), p-HSF1 (E), VEGF (F), p-AKT (G), PI3 Kinase (p85) (H), BCKDH (I), OGT (J), GFAT (K), GPx (L), Catalase (M), SOD (N), PGC (O), Sum of BCAAs (P). Protein sources: whey protein (WP), whey protein hydrolysate (WPH), Casein (CAS) control. Six groups: Sedentary CAS (control), Sedentary WP, Sedentary WPH, Exercised CAS, Exercised WP and Exercised WPH. All values were compared and related to CAS sedentary (protein source control) and reported as %CAS value. Different letters represent significant differences. doi:10.1371/journal.pone.0083437.g001

WPH intake increased HSP90 expression in the skeletal muscle of rats in both the sedentary and exercised groups. HSP90 is a chaperone protein essential to the viability of eukaryotic cells and is abundantly expressed, representing about 1–2% of cell proteins even in unstressed cells [17,18], while its concentration may increase in response to stressful situations [17]. This is consistent with our results for sedentary (unstressed cells) and exercised (stressed cells) groups. HSP90 is involved in preventing protein aggregation [18] in the folding process, in the maintenance of cell

protein integrity and stabilization and activation of at least 200 signaling proteins [19].

According to the literature, increased HSP90 expression has a cytoprotective effect [4], promotes skeletal muscle protection in exercised animals [20], increases cell resistance [18], and protects against the accumulation of reactive oxygen species, thus reducing cytotoxicity [21]. Our results indicate that WPH intake favors the defense system represented by HSP90. However, no effect on HSPs was observed in the animals fed unhydrolyzed whey protein

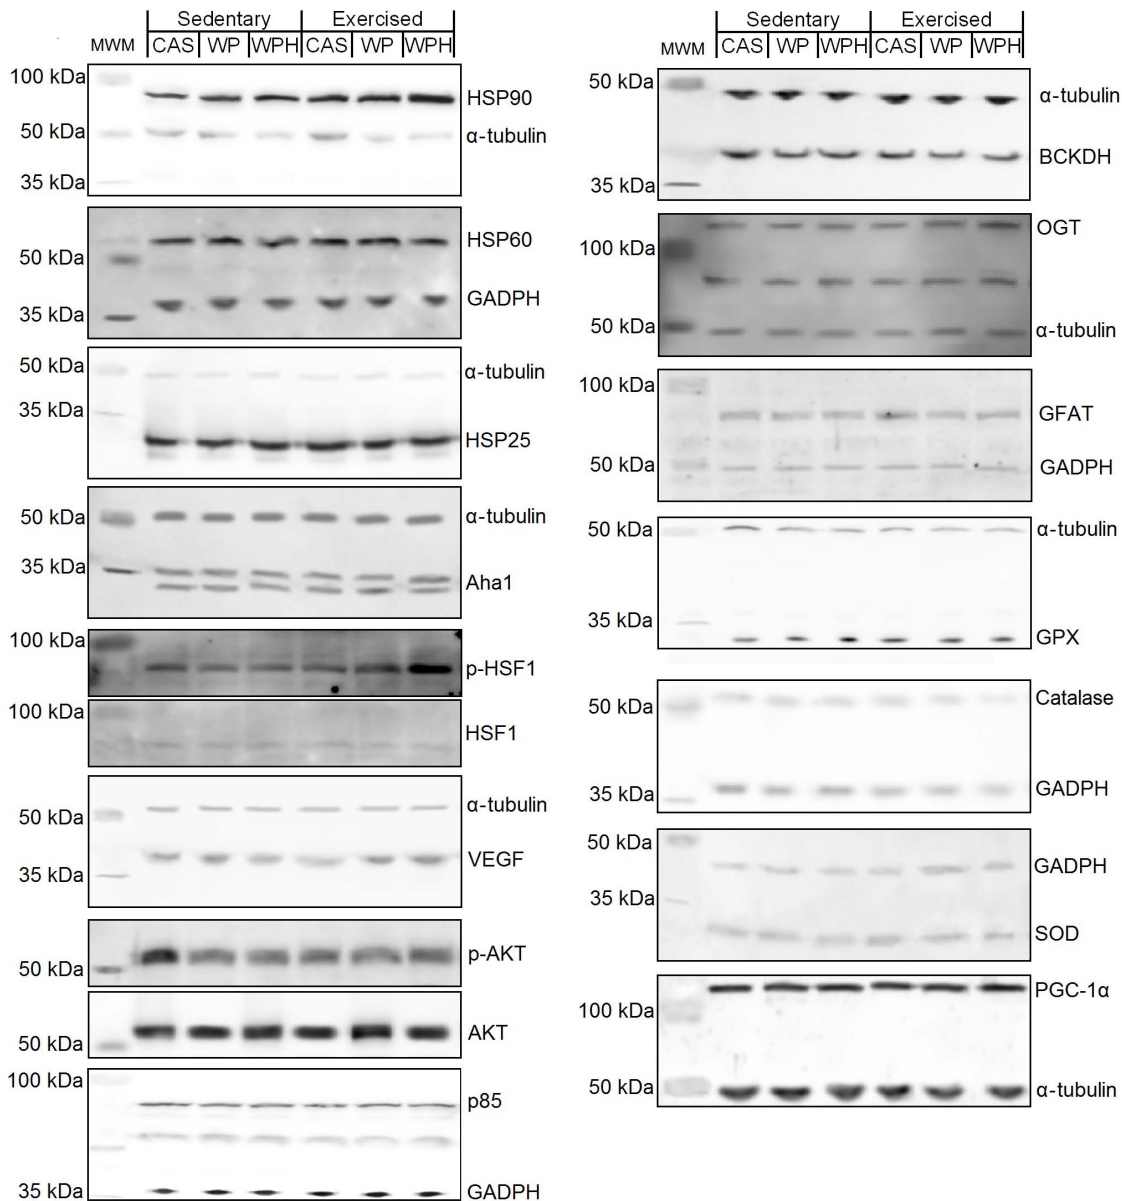

**Figure 2. Exercised groups were subjected to five sessions on a treadmill at the speed of 22 m/min for 30 minutes during the last week of the diet treatment.** The data were obtained from gastrocnemius collected 6 hours after the last exercise session (n = 8 per group). The dietary proteins were consumed for 3 weeks. Mean and standard error for the blood analysis of: Albumin (A), total protein (B), uric acid (C), glucose (D), LDH (E), CK (F), AST (G), ALT (H), urea (I), creatinine (J). Protein sources: whey protein (WP), whey protein hydrolysate (WPH), Casein (CAS) control. Six groups: Sedentary CAS (control), Sedentary WP, Sedentary WPH, Exercised CAS, Exercised WP and Exercised WPH. All values were compared and related to CAS sedentary (protein source control) and reported as %CAS value. Different letters represent significant differences. doi:10.1371/journal.pone.0083437.g002

(WP), so this cannot be attributed to the speed of absorption, because this is the same (fast absorption) between the hydrolyzed and non-hydrolyzed forms of whey protein. It is possible that the hydrolyzed form contained bioactive peptides with the ability to enhance HSP expression.

Together with the increase in HSP90, WPH intake also promoted increased expression of its co-chaperone Aha1, which is known for accelerating conformational transitions and increasing the ATPase activity of HSP90 [22], thus facilitating the interaction between ATP and the N-terminal domain of HSP90, which is ATP-dependent [2]. Aha1 may also be regulated by

stress, together with HSP90, and it is believed that Aha1 is involved in folding processes mediated by HSP90 [23].

Another significant result of this study was the increase in vascular endothelial growth factor (VEGF) expression promoted by WPH and WP intake associated with exercise. VEGF plays an important role in angiogenesis, which may favor the supply of oxygen and substrates in tissues. Furthermore, under stress conditions, VEGF may promote cell survival by activating the phosphatidylinositol kinase (PI3-kinase-p85) and phosphorylating protein kinase B (AKT). Akt is involved in anti-apoptotic signaling and is capable of promoting survival [24]. In the present study, no

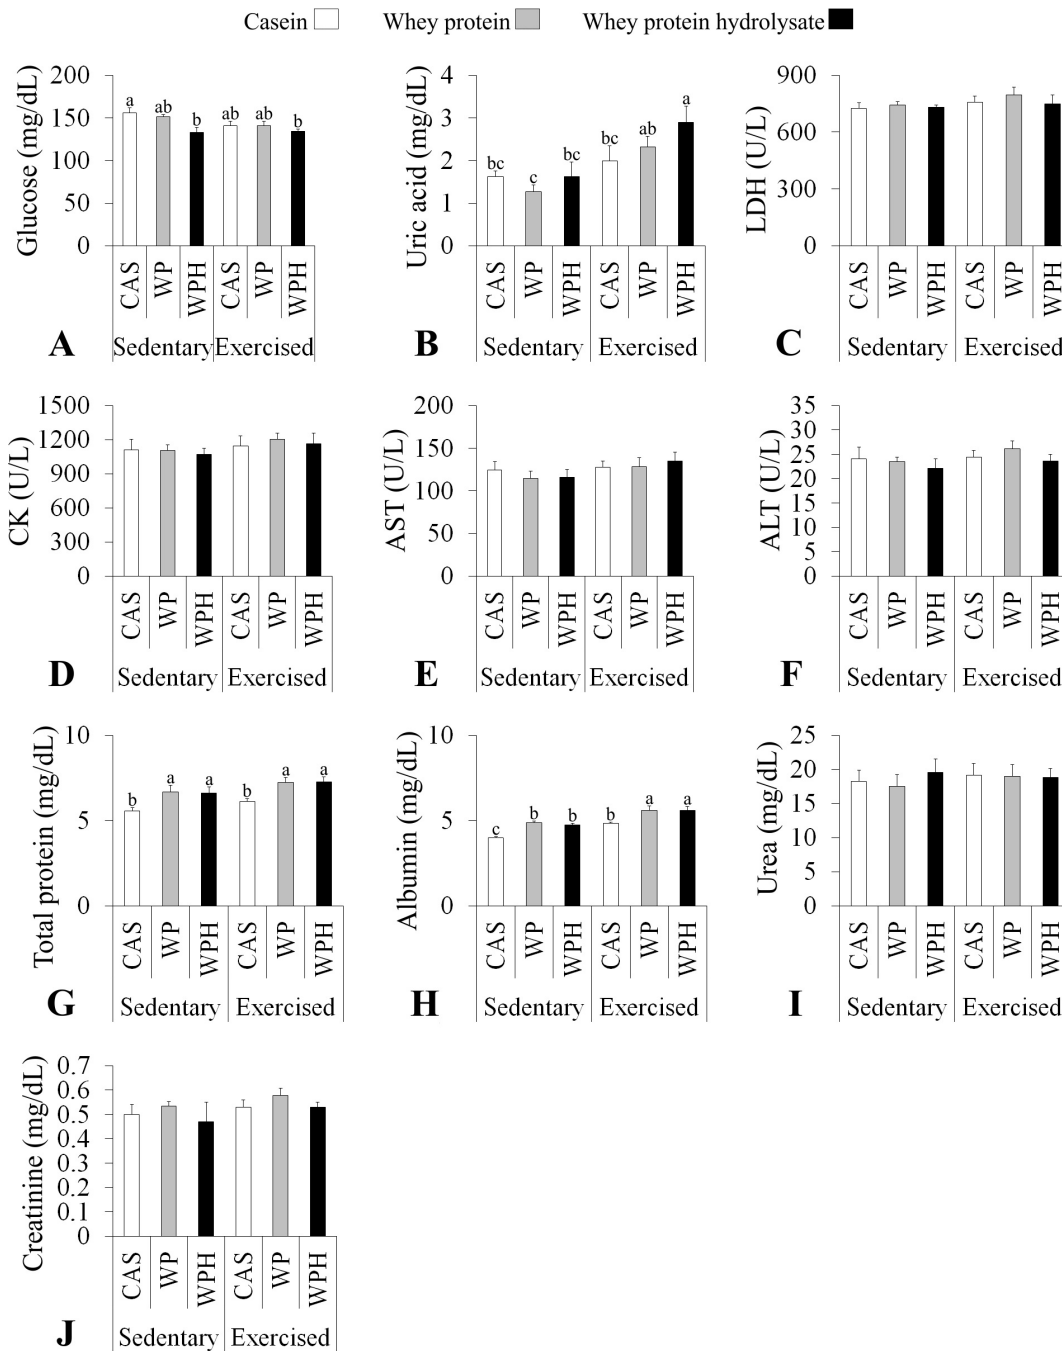

**Figure 3. Representative blots of independent experiments are shown. GAPDH or  $\alpha$  tubulin is also shown as loading control.**  
doi:10.1371/journal.pone.0083437.g003

effect was found on PI3-kinase (p85); however, WPH intake in exercised animals increased Akt phosphorylation.

There were no alterations in HSP60 expression which, according to the literature, increases slightly in stressful situations [2], the same was true for HSP25. For other kinds of stress, the HSP60 seems to be more responsive, such as in Alzheimer’s disease [25].

HSP expression may be muscle fiber type specific. In the present study, we performed the analysis in the gastrocnemius muscle, which is a tissue with mixed fibers. Folkesson et al. [26] showed that the type of fiber (slow or fast) does not change the HSP60

expression. While HSP70 expression showed higher staining intensity in type I fibers compared to type II fibers. Hsp25 showed higher intensity in type II fibers compared to type I fibers. Milne and Noble [27] show that the soleus muscle (slow fibers) is more stress responsive compared to fast muscle fibers and that this response is dependent on the intensity of the exercise.

Heat shock factor (HSF1) plays an important role in the transcription process of HSPs because it is rapidly activated and is present in most eukaryotes in several types of stress. Under stress conditions, HSF1 assumes an active trimeric state, which allows it to reach the nucleus where it is phosphorylated and binds to the

**Table 2.** Dietary intake and organs weight parameters.

|                  | Sedentary |       |        |       |        |       | Exercised |       |        |       |        |       |
|------------------|-----------|-------|--------|-------|--------|-------|-----------|-------|--------|-------|--------|-------|
|                  | CAS       |       | WP     |       | WPH    |       | CAS       |       | WP     |       | WPH    |       |
|                  | Mean      | SEM   | Mean   | SEM   | Mean   | SEM   | Mean      | SEM   | Mean   | SEM   | Mean   | SEM   |
| Diet intake/day  | 23.40     | 0.76  | 22.70  | 0.49  | 24.89  | 0.63  | 24.9      | 1.12  | 22.83  | 1.08  | 23.45  | 0.90  |
| Protein intake   | 53.42     | 4.21  | 56.13  | 6.30  | 58.63  | 4.00  | 63.79     | 7.02  | 54.14  | 5.10  | 56.82  | 3.36  |
| PER <sup>1</sup> | 4.21      | 0.09  | 4.08   | 0.07  | 4.17   | 0.07  | 3.80      | 0.04  | 4.21   | 0.06  | 4.16   | 0.07  |
| Weight start     | 62.42     | 3.30  | 56.30  | 3.34  | 56.18  | 3.38  | 58.67     | 2.57  | 56.77  | 2.52  | 59.88  | 3.12  |
| Body mass gain   | 224.95    | 9.14  | 229.35 | 8.18  | 244.83 | 5.16  | 242.94    | 8.93  | 228.37 | 6.81  | 236.47 | 5.99  |
| FEC <sup>2</sup> | 0.50      | 0.01  | 0.49   | 0.01  | 0.50   | 0.02  | 0.46      | 0.03  | 0.50   | 0.01  | 0.49   | 0.01  |
| Heart *          | 0.36      | 0.01  | 0.36   | 0.01  | 0.34   | 0.01  | 0.35      | 0.01  | 0.37   | 0.02  | 0.37   | 0.01  |
| Lung *           | 0.51      | 0.01  | 0.51   | 0.01  | 0.52   | 0.01  | 0.53      | 0.01  | 0.56   | 0.02  | 0.5    | 0.01  |
| Spleen *         | 0.25      | 0.01  | 0.29   | 0.01  | 0.25   | 0.01  | 0.29      | 0.01  | 0.29   | 0.01  | 0.28   | 0.01  |
| Kidney *         | 0.35      | 0.01  | 0.36   | 0.01  | 0.35   | 0.01  | 0.35      | 0.01  | 0.37   | 0.01  | 0.39   | 0.01  |
| Gastrocnemius *  | 0.52      | 0.01  | 0.52   | 0.02  | 0.50   | 0.02  | 0.53      | 0.01  | 0.55   | 0.01  | 0.53   | 0.01  |
| Soleus *         | 0.03      | 0.002 | 0.03   | 0.001 | 0.03   | 0.002 | 0.03      | 0.003 | 0.03   | 0.001 | 0.03   | 0.001 |

<sup>1</sup>Protein efficiency ratio;<sup>2</sup>Food efficiency coefficient.

Diets: CAS – Casein (control), WP – Whey protein, WPH – Whey protein hydrolysate.

\*tissue weight related to body weight (100 g).

doi:10.1371/journal.pone.0083437.t002

**Table 3.** Mean muscle free amino acid profile (μmol/kg).

| Amino acid     | Sedentary             |         |                        |          |                       |         | Exercised            |        |                        |         |                       |        |
|----------------|-----------------------|---------|------------------------|----------|-----------------------|---------|----------------------|--------|------------------------|---------|-----------------------|--------|
|                | CAS                   |         | WP                     |          | WPH                   |         | CAS                  |        | WP                     |         | WPH                   |        |
|                | Mean                  | SEM     | Mean                   | SEM      | Mean                  | SEM     | Mean                 | SEM    | Mean                   | SEM     | Mean                  | SEM    |
| Aspartic acid  | 532.42 <sup>c</sup>   | 42.76   | 1524.03 <sup>a</sup>   | 1077.65  | 906.90 <sup>b</sup>   | 325.00  | 375.42 <sup>c</sup>  | 17.13  | 646.02 <sup>bc</sup>   | 269.61  | 441.08 <sup>c</sup>   | 42.93  |
| Glutamate      | 2624.71 <sup>c</sup>  | 480.19  | 4256.60 <sup>ab</sup>  | 126.96   | 4035.48 <sup>ab</sup> | 1549.37 | 2576.68 <sup>c</sup> | 99.54  | 4681.69 <sup>a</sup>   | 699.52  | 3225.35 <sup>bc</sup> | 397.79 |
| Hydroxyproline | 158.64 <sup>bc</sup>  | 46.98   | 249.64 <sup>a</sup>    | 176.52   | 149.35 <sup>bc</sup>  | 27.47   | 122.15 <sup>bc</sup> | 7.06   | 173.05 <sup>b</sup>    | 1.74    | 94.78 <sup>c</sup>    | 15.93  |
| Asparagine     | 857.15 <sup>ab</sup>  | 199.66  | 944.32 <sup>a</sup>    | 87.34    | 874.02 <sup>ab</sup>  | 170.18  | 664.58 <sup>bc</sup> | 9.20   | 919.84 <sup>a</sup>    | 75.23   | 615.50 <sup>c</sup>   | 90.54  |
| Serine         | 2183.06               | 449.53  | 2117.05                | 234.78   | 1973.73               | 359.99  | 1817.59              | 115.28 | 2119.35                | 293.29  | 1672.45               | 60.15  |
| Glutamine      | 8446.66 <sup>bc</sup> | 1522.09 | 10223.21 <sup>b</sup>  | 172.63   | 9073.03 <sup>bc</sup> | 2046.33 | 7139.44 <sup>c</sup> | 99.72  | 12936.53 <sup>a</sup>  | 461.69  | 7892.17 <sup>c</sup>  | 557.05 |
| Glycine        | 708.24 <sup>b</sup>   | 63.25   | 869.51 <sup>a</sup>    | 74.03    | 760.64 <sup>ab</sup>  | 75.47   | 514.64 <sup>c</sup>  | 24.37  | 744.21 <sup>ab</sup>   | 89.08   | 525.45 <sup>c</sup>   | 70.31  |
| Histidine      | 281.92                | 79.71   | 200.30                 | 8.20     | 262.83                | 58.63   | 218.94               | 29.43  | 198.35                 | 109.05  | 160.98                | 25.15  |
| Arginine       | 11988.93 <sup>c</sup> | 1922.66 | 15603.53 <sup>b</sup>  | 11033.36 | 18411.99 <sup>a</sup> | 142.16  | 9607.97 <sup>d</sup> | 467.83 | 16896.30 <sup>ab</sup> | 1505.50 | 11950.89 <sup>c</sup> | 343.63 |
| Taurine        | 3240.83 <sup>c</sup>  | 407.41  | 4304.41 <sup>b</sup>   | 134.75   | 5073.11 <sup>a</sup>  | 8.47    | 2477.55 <sup>d</sup> | 19.39  | 4595.29 <sup>ab</sup>  | 758.24  | 3345.59 <sup>c</sup>  | 123.78 |
| Threonine      | 2419.16 <sup>cd</sup> | 597.10  | 2976.74 <sup>abc</sup> | 184.50   | 3338.21 <sup>ab</sup> | 729.38  | 1993.04 <sup>d</sup> | 157.46 | 3674.79 <sup>a</sup>   | 548.61  | 2564.9 <sup>bcd</sup> | 164.88 |
| Alanine        | 978.16 <sup>cd</sup>  | 404.07  | 1663.98 <sup>a</sup>   | 11.00    | 1359.05 <sup>ab</sup> | 255.30  | 664.92 <sup>d</sup>  | 12.88  | 1515.24 <sup>a</sup>   | 83.34   | 1124.42 <sup>bc</sup> | 80.10  |
| Proline        | 1035.64 <sup>a</sup>  | 151.87  | 808.23 <sup>b</sup>    | 16.14    | 908.52 <sup>ab</sup>  | 21.87   | 939.99 <sup>ab</sup> | 49.42  | 811.20 <sup>b</sup>    | 33.05   | 881.92 <sup>b</sup>   | 30.33  |
| Tyrosine       | 87.44 <sup>a</sup>    | 22.40   | 54.24 <sup>b</sup>     | 3.18     | 46.25 <sup>b</sup>    | 5.01    | 88.71 <sup>a</sup>   | 8.73   | 66.09 <sup>b</sup>     | 8.10    | 49.72 <sup>b</sup>    | 2.15   |
| Valine         | 218.63 <sup>b</sup>   | 40.14   | 175.23 <sup>b</sup>    | 6.97     | 218.51 <sup>ab</sup>  | 20.52   | 204.93 <sup>b</sup>  | 35.65  | 258.97 <sup>a</sup>    | 1.44    | 213.93 <sup>ab</sup>  | 34.91  |
| Methionine     | 98.62                 | 26.08   | 89.65                  | 10.62    | 95.19                 | 7.63    | 78.25                | 6.73   | 99.97                  | 18.88   | 94.95                 | 1.48   |
| Cystine        | 8.80 <sup>c</sup>     | 1.00    | 12.30 <sup>b</sup>     | 8.69     | 18.90 <sup>b</sup>    | 0.26    | 48.73 <sup>a</sup>   | 20.20  | 31.49 <sup>ab</sup>    | 21.36   | 17.85 <sup>b</sup>    | 0.68   |
| Isoleucine     | 50.07 <sup>c</sup>    | 6.79    | 48.18 <sup>c</sup>     | 10.06    | 95.80 <sup>b</sup>    | 9.05    | 93.46 <sup>b</sup>   | 44.92  | 97.64 <sup>b</sup>     | 7.18    | 141.36 <sup>a</sup>   | 34.81  |
| Leucine        | 138.45 <sup>b</sup>   | 6.48    | 131.97 <sup>b</sup>    | 2.95     | 220.82 <sup>a</sup>   | 25.09   | 139.75 <sup>b</sup>  | 21.76  | 209.07 <sup>a</sup>    | 18.98   | 199.73 <sup>a</sup>   | 4.76   |
| Phenylalanine  | 63.79                 | 3.32    | 41.89                  | 26.43    | 67.32                 | 15.35   | 59.02                | 1.42   | 55.63                  | 3.89    | 67.90                 | 12.27  |
| Tryptophan     | 19.66 <sup>c</sup>    | 3.63    | 39.06 <sup>ab</sup>    | 3.06     | 33.76 <sup>b</sup>    | 10.36   | 11.63 <sup>c</sup>   | 3.61   | 47.58 <sup>a</sup>     | 6.18    | 34.65 <sup>b</sup>    | 10.20  |
| Lysine         | 895.09 <sup>ab</sup>  | 263.05  | 1159.80 <sup>a</sup>   | 192.02   | 1197.71 <sup>a</sup>  | 370.21  | 558.00 <sup>b</sup>  | 67.22  | 897.17 <sup>ab</sup>   | 136.76  | 979.09 <sup>ab</sup>  | 233.35 |

doi:10.1371/journal.pone.0083437.t003

gene promoter, initiating HSP synthesis [1,3,18]. There are other HSFs such as HSF2 and HSF3, however the function and capacity of HSF1 in HSP synthesis cannot be compensated for by other heat shock factors [28]. WPH promoted an increase in HSF1 phosphorylation in exercised animals, consistent with increased HSP90 expression.

It is known that the amino acid glutamine is capable of increasing the expression of different HSPs; however, the mechanism remains to be elucidated. *In vitro* studies have suggested that the key proteins GFAT and OGT from the hexosamine biosynthetic pathway could be involved [29]. We probed these proteins *in vivo*, investigating whether whey protein intake could also show some involvement on the hexosamine biosynthetic pathway, but no alterations were observed.

The antioxidant capacity of whey protein has already been described by others [7,30]. In our experiment, exercise reduced catalase expression in the gastrocnemius muscle when compared to the sedentary group. These results are consistent with other reports [31,32]. In contrast, some studies have demonstrated an increase in catalase in skeletal muscle after exercise [33,34]. In human skeletal muscle, catalase levels measured on a daily basis from pre-exercise up to the sixth day after exercise (time course) did not show any tendency or linearity [5]. This controversial result was also found for SOD [32,35,36]. A time-course study showed that there was a significant reduction in SOD levels in skeletal muscle after the third day that continued to decline up to the sixth day after exercise [5]. In our study, GPx did not differ between groups, although a reduction in GPx levels after exercise has already been reported [37]. These results indicate that antioxidant enzymes in skeletal muscle may be modulated independently and differentially influenced by diet and exercise.

## References

- Santoro MG (2000) Heat shock factors and the control of the stress response. *Biochem Pharmacol* 59: 55–63.
- Lanneau D, Brunet M, Frisan E, Solary E, Fontenay M, et al. (2008) Heat shock proteins: essential proteins for apoptosis regulation. *J Cell Mol Med* 12: 743–761.
- Kampinga HH, Craig EA (2010) The HSP70 chaperone machinery: J proteins as drivers of functional specificity. *Nat Rev Mol Cell Biol* 11: 579–592.
- Maglara AA, Vasilaki A, Jackson MJ, McArdle A (2003) Damage to developing mouse skeletal muscle myotubes in culture: protective effect of heat shock proteins. *J Physiol* 548: 837–846.
- Khassaf M, Child RB, McArdle A, Brodie DA, Esanu C, et al. (2001) Time course of responses of human skeletal muscle to oxidative stress induced by nondamaging exercise. *J Appl Physiol* 90: 1031–1035.
- Latchman DS (2004) Protective effect of heat shock proteins in the nervous system. *Curr Neurovasc Res* 1: 21–27.
- Zhang QX, Ling YF, Sun Z, Zhang L, Yu HX, et al. (2012) Protective effect of whey protein hydrolysates against hydrogen peroxide-induced oxidative stress on PC12 cells. *Biotechnol Lett* 11: 2001–2006.
- Lollo PCB, Amaya-Farfan J, Carvalho-Silva LB (2011) Physiological and physical effects of different milk protein supplements in elite soccer players. *Exercise Physiology & Sports Medicine* 30: 49–57.
- Morato PN, Lollo PCB, Moura CS, Batista TM, Carneiro EM, et al. (2013) A dipeptide and an amino acid present in whey protein hydrolysate increase translocation of GLUT-4 to the plasma membrane in Wistar rats. *Food Chem* 139: 853–859.
- De Moura CS, Lollo PCB, Morato PN, Carneiro EM, Amaya-Farfan JA (2013) Whey protein hydrolysate enhances the exercise-induced heat shock protein (HSP70) response in rats. *Food Chem* 136: 1350–1357.
- Nery-Diez AC, Carvalho IR, Amaya-Farfan J, Abecia-Soria MI, Miyasaka CK, et al. (2010) Prolonged Ingestion of Prehydrolyzed Whey Protein Induces Little or No Change in Digestive Enzymes, but Decreases Glutaminase Activity in Exercising Rats. *J Med Food* 13: 992–998.
- Reeves PG, Nielsen FH, Fahey Jr GC (1993) AIN-93 purified diets for laboratory rodents: final report of the American Institute of Nutrition ad hoc writing committee on the reformulation of the AIN-76A rodent diet. *J Nutr* 123: 1939–1951.
- Salo DG, Donovan CM, Davies KJ (1991) HSP70 and other possible heat shock or oxidative stress proteins are induced in skeletal muscle, heart, and liver during exercise. *Free Radic Biol Med* 11: 239–246.
- Wischmeyer PE, Hahana M, Wolfson R, Ren H, Musch MM, et al. (2001) Glutamine induces heat shock protein and protects against endotoxin shock in the rat. *J Appl Physiol* 90: 2403–2410.
- Lowry OH, Rosebrough NJ, Farr AL, Randall RJ (1951) Protein measurement with the Folin phenol reagent. *J Biol Chem* 193: 265–275.
- White JA, Hart RJ, Fry JC (1986) An evaluation of the waters pico-tag system for the amino acid analysis of food materials. *J Automat Chem* 8: 170–177.
- Garrido C, Gurbuxani S, Ravagnan L, Kroemer G (2001) Heat Shock Proteins: Endogenous modulators of apoptotic cell death. *Biochem Biophys Res Commun* 286: 433–442.
- Csermely P, Schnaider T, Soti C, Prohászka Z, Nardai G (1998) The 90-kDa molecular chaperone family: structure, function, and clinical applications. A comprehensive review. *Pharmacol Ther* 79: 129–168.
- Picard D (2002) Heat-shock protein 90, a chaperone for folding and regulation. *Cell Mol Life Sci* 59:1640–1648.
- Kinnunen S, Hyyppä S, Oksala N, Laaksonen DE, Hannila ML et al. (2009) Alpha-Lipoic acid supplementation enhances heat shock protein production and decreases post exercise lactic acid concentrations in exercised standardbred trotters. *Res Vet Sci* 87: 462–467.
- Lee M, Lee HJ, Bach J, Park SC, Parke JS, et al. (2005) Down-regulated reactive oxygen species by HSP90 in 3HK-induced SKN-SH cell death. *Journal of Thermal Biology* 30: 43–45.
- Mollapour M, Neckers L (2012) Post-translational modifications of Hsp90 and their contributions to chaperone regulation. *Biochim Biophys Acta* 1823: 648–655.
- Mayer MP, Nikolay R, Bukau B (2002) Aha, another regulator for hsp90 chaperones. *Mol Cell* 10: 1255–1256.
- Byrne AM, Bouchier-Hayes DJ, Harmey JH (2005) Angiogenic and cell survival functions of vascular endothelial growth factor (VEGF). *J Cell Mol Med* 9: 777–794.
- Jiang YQ, Wang XL, Cao XH, Ye ZY, Li L, et al. (2013) Increased heat shock transcription factor 1 in the cerebellum reverses the deficiency of Purkinje cells in Alzheimer's disease. *Brain Research* 1519: 105–111.
- Folkesson ALM, Mackey ALL, Langberg H, Oskarsson E, Piehl-Aulin K, et al. (2013) The expression of heat shock protein in human skeletal muscle: effects of muscle fibre phenotype and training background. *Acta Physiol* 1–8.
- Milne KJ, Noble EG (2002) Exercise-induced elevation of HSP70 is intensity dependent. *J Appl Physiol* 93: 561–568.

## Author Contributions

Conceived and designed the experiments: CSM. Reviewed the manuscript: EMC JA-F. Performed the experiments: PCBL PNM LHN CSM. Analyzed the data: CSM. Wrote the manuscript: CSM.



28. Anckar J, Sistonen L (2011) Regulation of HSF1 function in the heat stress response: Implications in aging and disease. *Annu. Rev. Biochem* 80: 1089–1115.
29. Hamiel CR, Pinto S, Hau A, Wischmeyer PE (2009) Glutamine enhances heat shock protein 70 expression via increased hexosamine biosynthetic pathway activity. *Am J Physiol Cell Physiol* 297: 1509–1519.
30. Gad AS, Khadrawy YA, El-Nekeety AA, Mohamed SR, Hassan NS, et al. (2011) Antioxidant activity and hepatoprotective effects of whey protein and Spirulina in rats. *Nutrition* 27: 582–589.
31. Pinho RA, Andrades ME, Oliveira MR, Pirola AC, Zago MS, et al. (2006) Imbalance in SOD/CAT activities in rat skeletal muscles submitted to treadmill training exercise. *Cell Biol Int* 10: 848–853.
32. Higuchi M, Cartier LJ, Chen M, Holloszy JO (1985) Superoxide dismutase and catalase in skeletal muscle: adaptive response to exercise. *Gerontol* 40: 281–286.
33. Powers SK, Criswell D, Lawler J, Ji LL, Martin D, et al. (1994) Influence of exercise and fiber type on antioxidant enzyme activity in rat skeletal muscle. *Am J Physiol* 266: 375–380.
34. Terblanche SE (2000) The effects of exhaustive exercise on the activity levels of catalase in various tissues of male and female rats. *Cell Biol Int* 23: 749–753.
35. Fridovich I (1978) Superoxide radicals, superoxide dismutases and the aerobic lifestyle. *Photochem Photobiol* 28: 733–741.
36. Oh-ishi S, Kizaki T, Ookawara T, Sakurai T (1997) Endurance training improves the resistance of rat diaphragm to exercise-induced oxidative stress. *Am J Respir Crit Care Med* 156: 1579–85.
37. Aguiló A, Tauler P, Fuentespina E, Tur JA, (2005) Antioxidant response to oxidative stress induced by exhaustive exercise. *Physiol Behav* 84:1–7.
38. Shimomura Y, Murakami T, Nakai N, Nagasaki M, Harris RA (2004) Exercise promotes BCAA catabolism: effects of BCAA supplementation on skeletal muscle during exercise. *J Nutr* 134: 1583S–1587.
39. Waring WS, McKnight JA, Webb DJ, Maxwell SR (2006) Uric acid restores endothelial function in patients with type 1 diabetes and regular smokers. *Diabetes* 55: 3127–3132.
40. Pimenta FMV, Abecia-Soria MI, Auler F, Amaya-Farfan J (2006) Physical performance of exercising young rats fed hydrolysed whey protein at a sub-optimal level. *International Dairy Journal* 16: 984–991.
